# Supplementary material
Source: PubMed Central journal article supplement (PMC7839354)
Supplement: advancesADV2020003464-suppl1.pdf [file advancesADV2020003464-suppl1.pdf]

## Supplementary data

### **Elevated levels of tissue factor pathway inhibitor in patients with mild to moderate bleeding tendency**

Dino Mehic<sup>1</sup>, Alexander Tolios<sup>2,3,4</sup>, Stefanie Hofer<sup>1</sup>, Cihan Ay<sup>1</sup>, Helmuth Haslacher<sup>5</sup>, Judit Rejtö<sup>1</sup>, Willem H Ouwehand<sup>6,7,8</sup>, Kate Downes<sup>6,7,9</sup>, Matthias Haimel<sup>10,11</sup>, Ingrid Pabinger<sup>1</sup> and Johanna Gebhart<sup>1</sup>

<sup>1</sup> *Clinical Division of Hematology and Hemostaseology, Department of Medicine I, Medical University of Vienna, Vienna, Austria*

<sup>2</sup> *Department of Blood Group Serology and Transfusion Medicine, Medical University of Vienna, Vienna, Austria*

<sup>3</sup> *Center for Physiology and Pharmacology, Medical University of Vienna, Vienna, Austria*

<sup>4</sup> *Institute for Artificial Intelligence and Decision Support, Center for Medical Statistics, Informatics and Intelligent Systems, Medical University of Vienna, Vienna, Austria*

<sup>5</sup> *Department of Laboratory Medicine, Medical University of Vienna, Vienna, Austria*

<sup>6</sup> *Department of Haematology, University of Cambridge, Cambridge*

<sup>7</sup> *NHS Blood and Transplant Cambridge, United Kingdom*

<sup>8</sup> *Wellcome Sanger Institute, Wellcome Genome Campus, Hinxton, Cambridge, United Kingdom*

<sup>9</sup> *East Midlands and East of England Genomic Laboratory Hub, Cambridge University Hospitals NHS Foundation Trust, Cambridge Biomedical Campus, Cambridge, United Kingdom*

<sup>10</sup> *CeMM Research Center for Molecular Medicine of the Austrian Academy of Sciences, Vienna, Austria*

<sup>11</sup> *Ludwig Boltzmann Institute for Rare and Undiagnosed Diseases, Vienna, Austria*

**Correspondence:** Johanna Gebhart, MD, PhD  
Clinical Division of Hematology and Hemostaseology  
Department of Medicine I, Medical University of Vienna  
Waehringer Guertel 18-20, A-1090 Vienna, Austria  
Phone number: +43 1 40400 44170  
Fax: +43 1 40400 59980  
E-Mail: johanna.gebhart@meduniwien.ac.at

## Methods

### Supplementary paragraph 1 - Inclusion- and exclusion criteria

Patients aged  $\geq 16$  years who were referred to the hemostasis outpatient clinic of the Clinical Division of Hematology and Hemostaseology, Department of Medicine I, Medical University of Vienna, with a mild-to-moderate bleeding tendency and without a previous diagnosis of a bleeding disorder were included. Patients who had surgery or delivery within the last six weeks, bacterial infection within the last two weeks, active malignancy or pregnancy, thrombocytopenia ( $<100 \times 10^9/L$ ), intake of anticoagulants/antiplatelet-/anti-inflammatory drugs (last 5-10 days) or a current acute phase reaction were not included. Also patients under continuous anticoagulant and/or antiplatelet therapy and/or with impaired liver (prothrombin time  $<75\%$  of normal due to deficiency in vitamin K-dependent clotting factors) or kidney function (GFR  $<60$  mL/min/1.73 m<sup>2</sup>) were not included.

### Supplementary paragraph 2 - Assessment of bleeding severity

Upon study inclusion, patients and controls underwent a structured interview on the general medical and bleeding history using a standardized questionnaire. The bleeding phenotype was evaluated by two standardized bleeding assessment tools: the Vicenza bleeding score (BS) and from 2013 also the ISTH-BAT.<sup>1,2</sup> The interviews were performed by physicians or trained health personnel. A hemostatic laboratory assessment was performed, on the basis of which diagnoses of coagulation disorders were established or patients were categorized as patients with BUC. Within the applied standardized bleeding assessment tools, we recorded different bleeding symptoms, such as epistaxis, hematoma/easy bruising, small wound bleeding, oral mucosal and/or gingival bleeding, gastrointestinal bleeding, postpartum bleeding, muscle and/or joint bleeding, bleeding after tooth extraction, postsurgical bleeding, and menorrhagia and other bleedings in their most severe occurrence. In total, the bleeding score ranges from 0 (no symptoms) to 33 (all symptoms require medical intervention) points for the Vicenza BS<sup>1</sup> and 0 to 56 for the ISTH BAT,<sup>2</sup> respectively. Cut offs for pathological bleeding are defined as  $\geq 3$  points for males and  $\geq 5$  points for female patients for the Vicenza BS and  $\geq 4$  points for males and  $\geq 6$  points for females in the ISTH BAT. Both the Vicenza- and the ISTH BAT have a low ability to distinguish patients with an established bleeding disorder from those with BUC, as recently published.<sup>3</sup> We evaluated the absolute bleeding score, as well as the different bleeding manifestation sites.

**Supplementary paragraph 3 - Blood sampling**

Blood samples were drawn with a 21-gauge butterfly needle (Greiner Bio-One, Kremsmuenster, Austria) by antecubital venipuncture into a Vacuette tube (Greiner Bio-One, Kremsmuenster, Austria) containing trisodium citrate (nine parts of whole blood, one part of trisodium citrate 3.8%). Samples were timely processed to routine laboratory assessments and to storage at the biobank facility of the Medical University of Vienna ([www.biobank.at](http://www.biobank.at)).<sup>4</sup> For this project, platelet poor plasma was prepared by centrifugation at 2000g for 15 min at 15 °C (Hettich Rotanta 460 Robotic, Tuttlingen, Germany) and as a second step at 18,000g for 2 min (Eppendorf 5417R, Hamburg, Germany) and stored at <-70°C in the biobank. For DNA isolation, whole blood samples were also stored in the biobank.

**Supplementary paragraph 4 - Thrombogenomics and genetic testing**

Samples were processed in batches with 500ng of each sample fragmented using a Covaris E220 (Covaris Inc., Woburn, MA, USA). Samples were processed using the ROCHE KAPA HTP Library Preparation kit (Roche Diagnostics Ltd., Burgess Hill, UK).

**Supplementary table 1 - Laboratory tests performed in patients and healthy controls**

| <b>Screening tests and factor assays</b>                        |
|-----------------------------------------------------------------|
| Activated partial thromboplastin time (aPTT), seconds           |
| Prothrombin time (PT), %                                        |
| Fibrinogen-Clauss, mg/dL                                        |
| Von Willebrand factor antigen (VWF:Ag), %                       |
| Von Willebrand factor ristocetin cofactor activity (VWF:RCo), % |
| Factor VIII activity, %                                         |
| Factor IX activity, %                                           |
| Factor XIII activity, %                                         |
| Factor V activity in patients with PT<75% and aPTT>41 seconds   |
| Factor VII activity in patients with PT < 75%                   |
| Factor XI activity in patients with aPTT > 41 seconds           |
| <b>Platelet function testing</b>                                |
| <b>Light transmission aggregometry (Born)</b>                   |
| ADP (10µM), %                                                   |
| ADP (5µM), %                                                    |
| Arachidonic acid (1,6mM) , %                                    |
| Collagen (10µg/ml), %                                           |
| Epinephrin (5,5µM), %                                           |
| Ristocetin (1,2mg/ml), %                                        |
| Ristocetin (0,9mg/ml), %                                        |
| Ristocetin (0,6mg/ml), %                                        |
| TRAP (25µM), %                                                  |
| <b>Glycoproteinexpression</b>                                   |
| CD41 (GPIIb), %                                                 |
| CD61 (GPIIIa), %                                                |
| CD42a (GPIX), %                                                 |
| CD42b (GPIb-alpha), %                                           |
| CD36 (GPIV, Thrombospondin), %                                  |

ADP, Adenosindiphospat; EPI, Epinephrin; TRAP, thrombin receptor activating peptide; GPIIB, glycoprotein IIb; GPIIIa, glycoprotein IIIa; GPIX, glycoprotein IX; GPIb-alpha, glycoprotein Ib-alpha; GPIV, glycoprotein IV.

**Supplementary table 2 - Patients' distribution according to diagnosis and diagnostic criteria**

| <b>Diagnosis</b>                     | <b>n (%)</b>   | <b>Criteria for diagnosis and exact number of patients</b>                                                                                                                                                                                                                                                                                                                                                              |
|--------------------------------------|----------------|-------------------------------------------------------------------------------------------------------------------------------------------------------------------------------------------------------------------------------------------------------------------------------------------------------------------------------------------------------------------------------------------------------------------------|
| Bleeding of unknown cause (BUC)      | 420<br>(67.7%) | defined as patients with normal results in all laboratory tests on plasmatic coagulation and platelet function                                                                                                                                                                                                                                                                                                          |
| VWF:Ag and/or VWF:RCo $\leq 50$ U/mL | 53 (8.6%)      | defined as patients with VWF values less than or equal to 50 U/mL<br><br><i>18 patients (32.7%) with VWF:Ag and/or VWF:RCo &lt;30 U/mL and 37 patients (67.3%) with VWF:Ag and/or VWF:RCo <math>\geq 30</math> and <math>\leq 50</math> U/mL</i>                                                                                                                                                                        |
| Platelet function defect (PFD)       | 117<br>(18.9%) | Definite PFD (n=35, 29.9%), defined by abnormalities in the LTA with 2 or more agonists at least 2 different occasions<br>Possible PFD* (n=82, 70.1%), defined by abnormal LTA aggregation curves upon stimulation with 1 or more agonists or in whom platelet function was investigated at only one occasion<br><br><i>*includes 2 patients with additional mild factor XI deficiency (FXI <math>\leq 60</math> %)</i> |
| Coagulation factor deficiency (CFD)  | 23 (3.7%)      | Factor VIII deficiency (FVIII $\leq 50$ %): n=14 (60.9%)<br>Factor IX deficiency (FIX $\leq 50$ %): n=5 (38.5%)<br>Factor XI deficiency (FXI $\leq 60$ %): n=3 (13.0%)<br>Factor XIII deficiency (FX $\leq 10$ %): n=1 (4.3%)<br><br>None of our patients had FV deficiency (FV $\leq 60$ %) <sup>5</sup>                                                                                                               |
| Hypo-/Dysfibrinogenemia              | 3 (0.5%)       | Quantitative deficiency or qualitative defect of fibrinogen                                                                                                                                                                                                                                                                                                                                                             |
| PFD and VWF $\leq 50$ U/mL           | 4 (0.6%)       | Patients that had both, PFD and VWF $\leq 50$ U/mL<br><br><i>For analysis all patients were allocated to both the PFD and VWF <math>\leq 50</math> U/mL sub-cohort</i>                                                                                                                                                                                                                                                  |

VWF:Ag, von Willebrand factor antigen; VWF:RCo, von Willebrand factor activity;

**Supplementary table 3:** Vicenza bleeding score of patients with high free TFPI $\alpha$  levels ( $\geq 95^{\text{th}}$  percentile of healthy controls,  $\geq 15.4$  ng/mL) compared to those below this cut-off in all patients with MBDs and according to the established diagnoses

|                     | Vicenza BS                                     |                                                     |      | ISTH BAT                                       |                                                     |       |
|---------------------|------------------------------------------------|-----------------------------------------------------|------|------------------------------------------------|-----------------------------------------------------|-------|
|                     | TFPI $\alpha$ < 95 <sup>th</sup><br>percentile | TFPI $\alpha$ $\geq$ 95 <sup>th</sup><br>percentile | p    | TFPI $\alpha$ < 95 <sup>th</sup><br>percentile | TFPI $\alpha$ $\geq$ 95 <sup>th</sup><br>percentile | p     |
|                     | mean [ $\pm$ SD]                               | mean [ $\pm$ SD]                                    |      | mean [ $\pm$ SD]                               | (mean [ $\pm$ SD])                                  |       |
| <b>All patients</b> | 5.8 [ $\pm$ 3.0]                               | 5.8 [ $\pm$ 3.1]                                    | .877 | 6.5 [ $\pm$ 3.5]                               | 7.3 [ $\pm$ 3.8]                                    | 0.204 |
| <b>BUC</b>          | 5.7 [ $\pm$ 2.9]                               | 5.6 [ $\pm$ 3.0]                                    | .700 | 6.4 [ $\pm$ 3.3]                               | 6.9 [ $\pm$ 3.3]                                    | 0.482 |
| <b>PFD</b>          | 6.1 [ $\pm$ 3.2]                               | 5.4 [ $\pm$ 2.7]                                    | .458 | 7.0 [ $\pm$ 4.0]                               | 6.1 [ $\pm$ 2.9]                                    | 0.834 |

TFPI, tissue factor pathway inhibitor; BS, bleeding score; BUC, bleeding of unknown cause; PFD, platelet function defect;

**Supplementary table 4** Comparison of freeTFPI $\alpha$  levels between blood group O vs. non-O in patients and healthy controls

|                  |          | <b>Blood group O</b> |          | <b>Blood group non-O</b> | <b>p</b> |
|------------------|----------|----------------------|----------|--------------------------|----------|
|                  | <b>n</b> | <b>median [IQR]</b>  | <b>n</b> | <b>median [IQR]</b>      |          |
| Healthy controls | 31       | 7.8 [3.4-11.5]       | 69       | 7.7 [4.8-10.6]           | 0.889    |
| All patients*    | 314      | 8.3 [5.7-11.5]       | 301      | 8.2 [5.3-12.1]           | 0.858    |
| BUC              | 198      | 8.6 [5.9-12.2]       | 220      | 8.3 [5.2-11.9]           | 0.521    |
| PFD              | 60       | 9.0 [5.8-11.5]       | 54       | 8.9 [5.8-13.0]           | 0.538    |

BUC, bleeding of unknown cause; PFD, platelet function defects

\* blood group data missing in 5 patients (2 in BUC subgroup, 3 in PFD subgroup)

**Supplementary table 5** Correlation of free TFPI $\alpha$  with global coagulation tests and thrombin generation parameters in patient groups with increased TFPI $\alpha$  levels

|                            | Controls  | All patients     | BUC              | PFD              |
|----------------------------|-----------|------------------|------------------|------------------|
| <b>APTT, seconds</b>       | 0.082 ns  | -0.044 ns        | -0.056 ns        | 0.057 ns         |
| <b>PT, %</b>               | 0.116 ns  | 0.151 ***        | 0.177 ***        | 0.016 ns         |
| <b>TGA</b>                 |           |                  |                  |                  |
| Lag time, min              | 0.198 ns  | <b>0.247 ***</b> | <b>0.233 ***</b> | <b>0.350 ***</b> |
| Velocity index, nmol/L/min | -0.081 ns | -0.052 ns        | -0.093 ns        | -0.121 ns        |
| Peak thrombin, nmol/L      | -0.059 ns | -0.047 ns        | -0.161 **        | -0.147 ns        |
| TTP, min                   | 0.153 ns  | 0.144 ***        | 0.161 **         | <b>0.231 *</b>   |
| AUC, nmol/L x min          | 0.076 ns  | -0.088 *         | -0.126 **        | <b>-0.220 *</b>  |

BUC, bleeding of unknown cause; PFD, platelet function defects; APTT, activated partial thromboplastin time ; TGA, thrombin generation assay; PT prothrombin time; TGA, thrombin generation assay; TTP, time to peak; AUC, area under the curve; Abs, maximum absorbance at plateau

Weak (r=0.2-0.4), moderate (r=0.4-0.6), strong (r=0.6-0.8) and very strong (r=0.8-1.0) correlations (Spearman)

Significance: \*p<0.05; \*\*p<0.01; \*\*\*p<0.001; ns: not significant



**Supplementary table 6** Variants within the F5 gene that were found in all patients

| Variant            | Exon | Pathogenicity*                                                                         |
|--------------------|------|----------------------------------------------------------------------------------------|
| rs6025 cAa/cGa     | 10   | pathogenic,benign,risk-factor,conflicting-interpretations-of-pathogenicity (FV Leiden) |
| rs6030 Atg/Gtg     | 16   | uncertain significance                                                                 |
| rs4524 aAa/aGa     | 13   | uncertain significance                                                                 |
| rs1046712 Ctt/Att  | 13   | likely benign                                                                          |
| rs13306334 Ctc/Ttc | 13   | likely benign                                                                          |
| rs1800595 cAt/cGt  | 13   | likely benign                                                                          |
| rs4525 cAt/cGt     | 13   | likely benign                                                                          |
| rs6018 aAc/aCc     | 13   | likely benign                                                                          |
| rs6019 Gat/Cat     | 3    | likely benign                                                                          |
| rs6020 aGa/aAa     | 10   | likely benign                                                                          |
| rs6027 gAt/gGt     | 25   | likely benign                                                                          |
| rs6032 Aag/Gag     | 13   | likely benign                                                                          |
| rs6033 aTg/aCg     | 8    | likely benign                                                                          |
| rs9332608 Cca/Tca  | 13   | likely benign                                                                          |
| rs9332701 aTg/aCg  | 24   | likely benign                                                                          |

\* as stated in dbSNP

**Supplementary table 7** Clinical and laboratory characteristics of three patients with highest TFPI $\alpha$  values (> 40 ng/mL)

|                             | <b>Patient 1</b>                                                                            | <b>Patient 2</b>                                                                | <b>Patient 3</b>                                       |
|-----------------------------|---------------------------------------------------------------------------------------------|---------------------------------------------------------------------------------|--------------------------------------------------------|
| Free TFPI $\alpha$ , ng/mL  | 53.7                                                                                        | 50.0                                                                            | 41.5                                                   |
| FV short (western blot)     | not detectable                                                                              | not detectable                                                                  | not detectable                                         |
| Lag time (TGA), min         | 8.1                                                                                         | 12.6                                                                            | 11.1                                                   |
| Sex                         | female                                                                                      | female                                                                          | female                                                 |
| Age, years                  | 62                                                                                          | 34                                                                              | 59                                                     |
| Diagnosis                   | BUC                                                                                         | BUC                                                                             | BUC                                                    |
| Vicenza BS                  | 9                                                                                           | 5                                                                               | 5                                                      |
| Number of bleeding symptoms | 4                                                                                           | 3                                                                               | 3                                                      |
| Symptoms                    | Small wound bleeding, bleeding after teeth extractions, post-surgical bleeding, menorrhagia | Oral mucosal bleeding, bleeding after teeth extractions, post-surgical bleeding | Easy bruising, gastro-intestinal bleeding, menorrhagia |
| Blood group                 | O                                                                                           | O                                                                               | A                                                      |
| BMI, kg/m <sup>2</sup>      | 33.6                                                                                        | 20.0                                                                            | 27.7                                                   |
| APTT, seconds               | 34.2                                                                                        | 40.9                                                                            | 32.5                                                   |
| PT, %                       | 94                                                                                          | 83                                                                              | 110                                                    |

TFPI, tissue factor pathway inhibitor; TGA, thrombin generation assay; BUC, bleeding of unknown cause; BS, bleeding score; BMI, body mass index; APTT, activated partial thromboplastin time; PT, prothrombin time

**Supplementary figure 1** Immunoblot analysis of factor V in patients and healthy controls with highest free TFPI $\alpha$  values

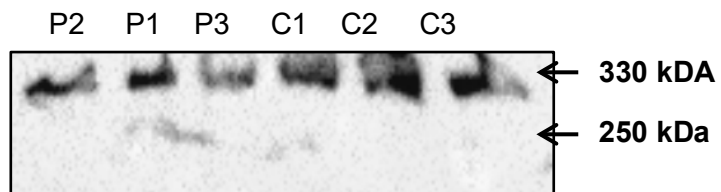

Western blot analysis with an anti-factor V antibody. No variant form of factor V (Factor V short / Factor V Amsterdam, 250kDa) could be detected in the investigated patients (P1, P2, P3) and healthy controls (C1, C2, C3) with highest free TFPI $\alpha$  values.

## References

1. Rodeghiero F, Castaman G, Tosi A, et al. The discriminant power of bleeding history for the diagnosis of type 1 von Willebrand disease: an international, multicenter study. *J Thromb Haemost* 2005;3(12):2619–2626.
2. Rodeghiero F, Tosi A, Abshire T, et al. ISTH/SSC bleeding assessment tool: A standardized questionnaire and a proposal for a new bleeding score for inherited bleeding disorders. *J Thromb Haemost* 2010;8(9):2063–2065.
3. Gebhart J, Hofer S, Kaider A, Rejtö J, Ay C, Pabinger I. The discriminatory power of bleeding assessment tools in adult patients with a mild to moderate bleeding tendency. *Eur J Intern Med* [Epub ahead of print].
4. Haslacher H, Gerner M, Hofer P, et al. Usage Data and Scientific Impact of the Prospectively Established Fluid Bioresources at the Hospital-Based MedUni Wien Biobank. *Biopreserv Biobank* 2018;16(6):477–482.
5. Tabibian S, Shiravand Y, Shams M, et al. A Comprehensive Overview of Coagulation Factor V and Congenital Factor V Deficiency. *Semin Thromb Hemost* 2019;45(05):523–543.
